# Supplementary material for: An aqueous polyethylene oxide-based solid-state electrolyte with high voltage stability for dendrite-free lithium deposition via a self-healing electrostatic shield
Source: Royal Society of Chemistry journal article supplement (doi:10.1039/d1dt02504j), 2021-01-01
Supplement: d1dt02504j1.pdf [file d1dt02504j1.pdf]

## Supporting information

### **Aqueous polyethylene oxide-based solid-state electrolyte with high voltage stability for dendrite-free lithium deposition via self-healing electrostatic shield**

Wen Liu <sup>a</sup>, Bin Qiu <sup>a</sup>, Jiawei Yan <sup>a</sup>, Chuanxin He <sup>a,b</sup>, Peixin Zhang <sup>a,b</sup>, Hongwei Mi <sup>a,b,\*</sup>

<sup>a</sup> College of Chemistry and Environmental Engineering, Shenzhen University, Shenzhen, Guangdong, 518060, PR China

<sup>b</sup> Guangdong Flexible Wearable Energy and Tools Engineering Technology Research Centre Shenzhen University, Shenzhen, Guangdong, 518060, PR China

\* Corresponding Author: [milia807@szu.edu.cn](mailto:milia807@szu.edu.cn) (H.Mi)

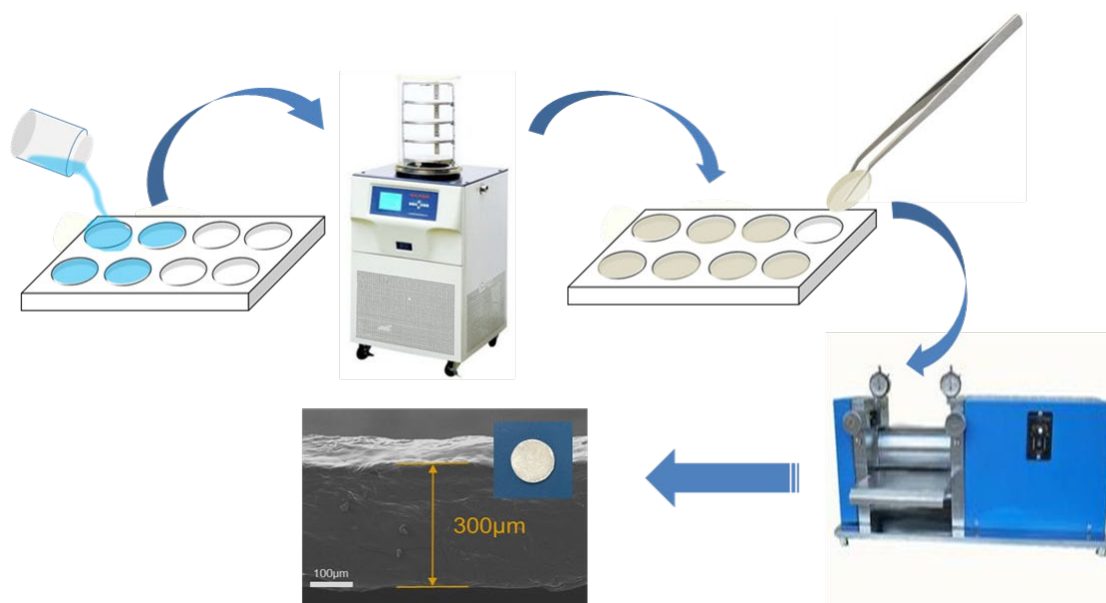

**Fig. S1** Preparation process for the BC-PEO-Cs<sup>+</sup> electrolytes.

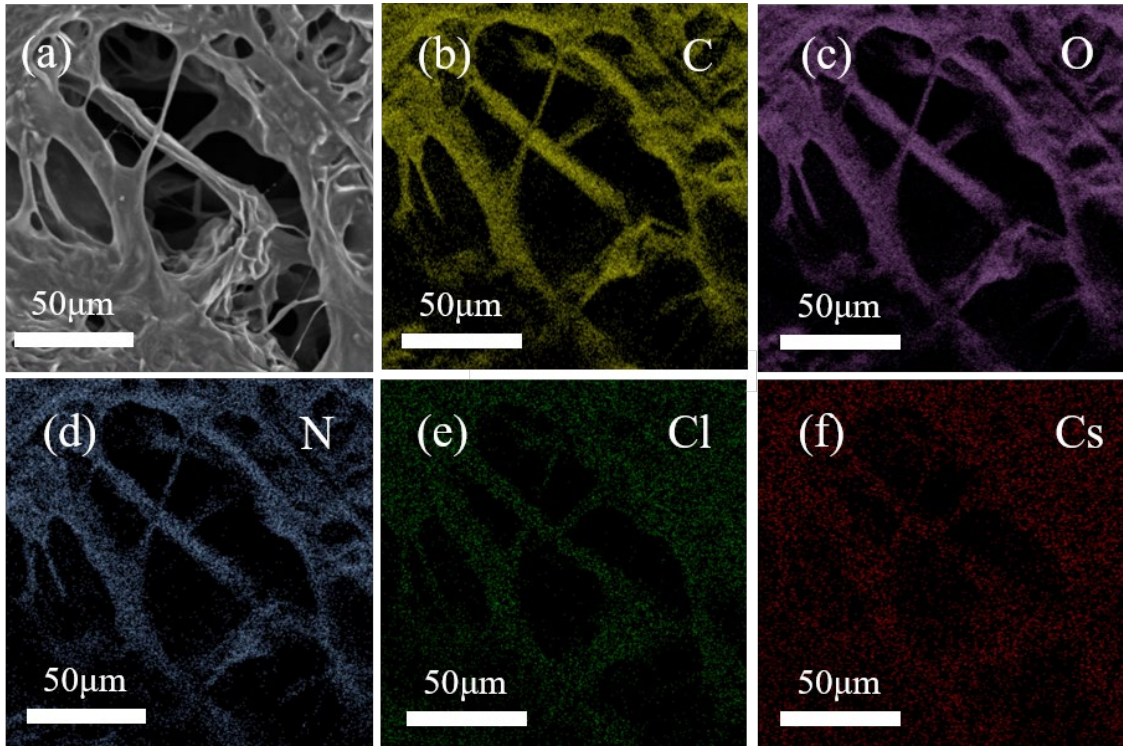

**Fig. S2** SEM images of BC-PEO-Cs<sup>+</sup> electrolyte: (a) Cross-sectional morphology, (a) corresponding elemental mappings of (b)C, (c)O, (d)N, (e)Cl, (f)Cs.

The calculation formula of Li transference number is as follows:

$$t_{Li^+} = \frac{I_s(\Delta V - I_0 R_1^0)}{I_0(\Delta V - I_s R_1^s)}$$

where  $\Delta V$  is the applied voltage (10 mV),  $I_0$  and  $I_s$  are the initial current and steady current, respectively, during DC polarization process.  $R_1^0$  and  $R_1^s$  are the charge-transfer resistances of Li symmetric cell before and after DC polarization, respectively.

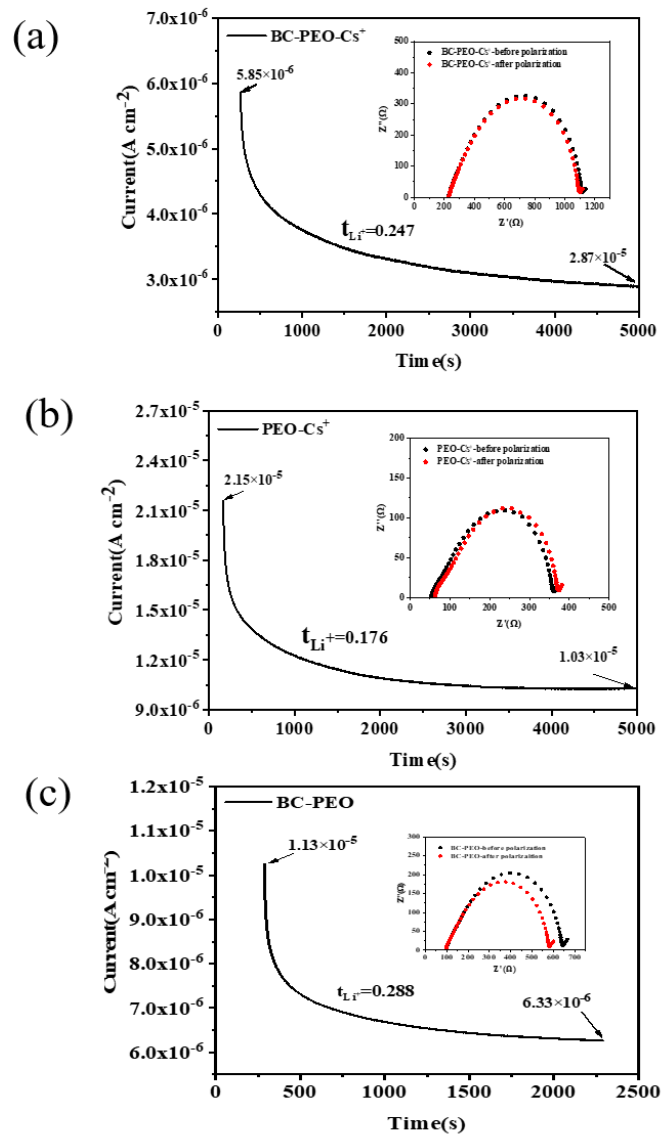

**Fig. S3** Li transference number test of (a) BC-PEO- $\text{Cs}^+$ , (b) PEO- $\text{Cs}^+$  and (c) BC-PEO electrolyte. (All of the cells are tested at an operating temperature of 60 °C)

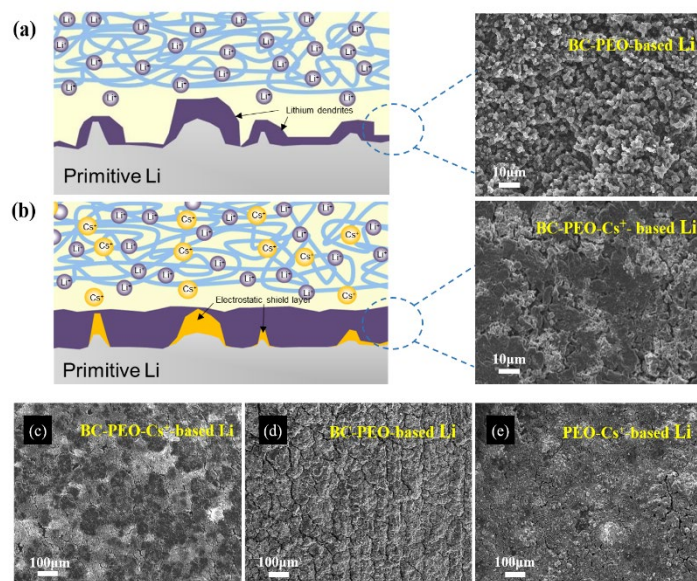

**Fig. S4** Mechanism illustration of Li<sup>+</sup> deposition with or without Cs<sup>+</sup> on Li metal. Surface morphologies of Li metal after 1000 h at 0.2 mA cm<sup>-2</sup> with (a)(d) BC-PEO, (b)(c) BC-PEO-Cs<sup>+</sup> and (e) PEO-Cs<sup>+</sup> electrolyte.

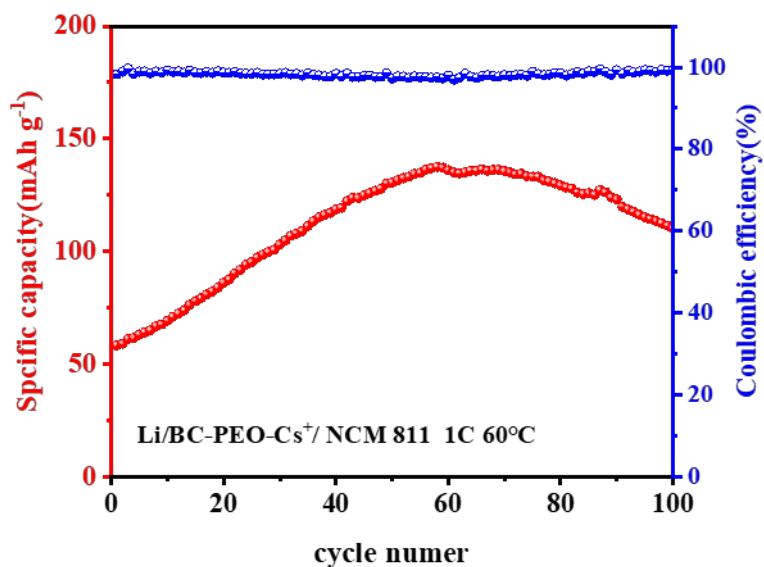

**Fig. S5** Cycling performance of Li | BC-PEO-Cs<sup>+</sup> | NCM 811 cell at 1 C. (The cell is tested at an operating temperature of 60 °C)

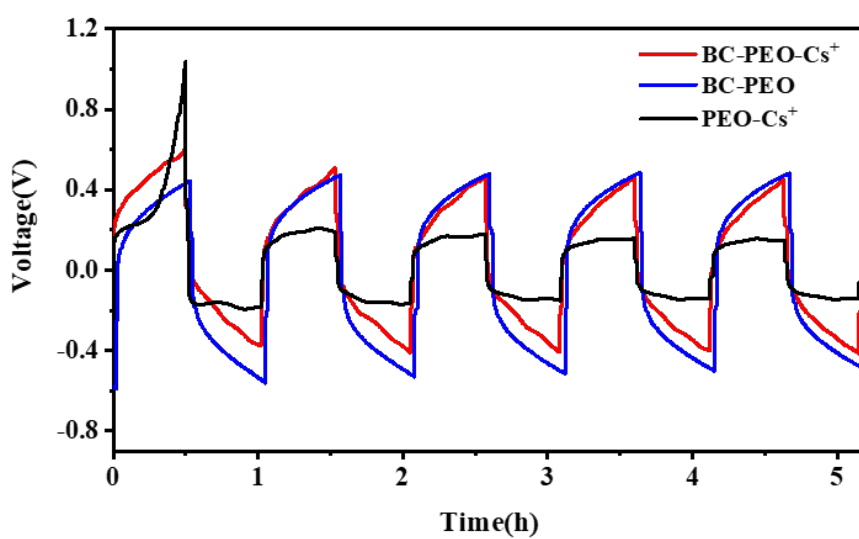

**Fig. S6** The initial cycling stability of Li-Li symmetrical cells assembled with ASSEs at  $0.2 \text{ mA cm}^{-2}$ .

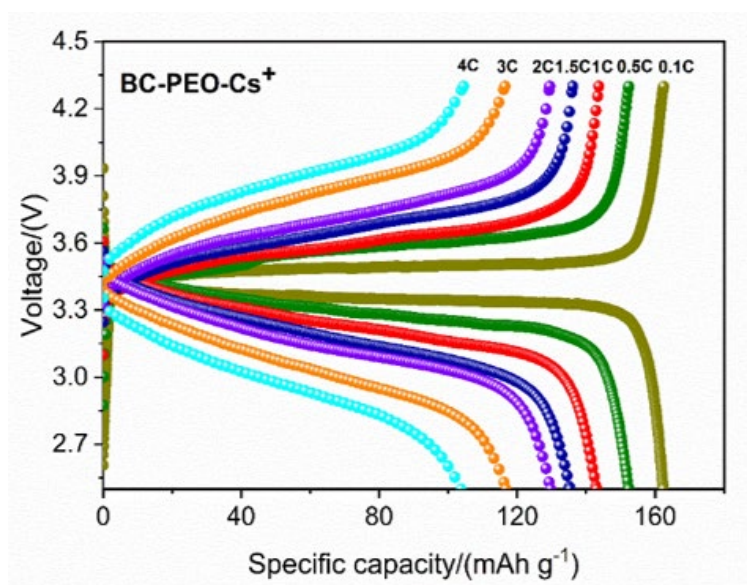

**Fig. S7** Charge-discharge profiles of the Li | BC-PEO-Cs<sup>+</sup> | LiFePO<sub>4</sub> cells at various C-rate from 0.1 to 4 C. (All of the cells are tested at an operating temperature of 60 °C)

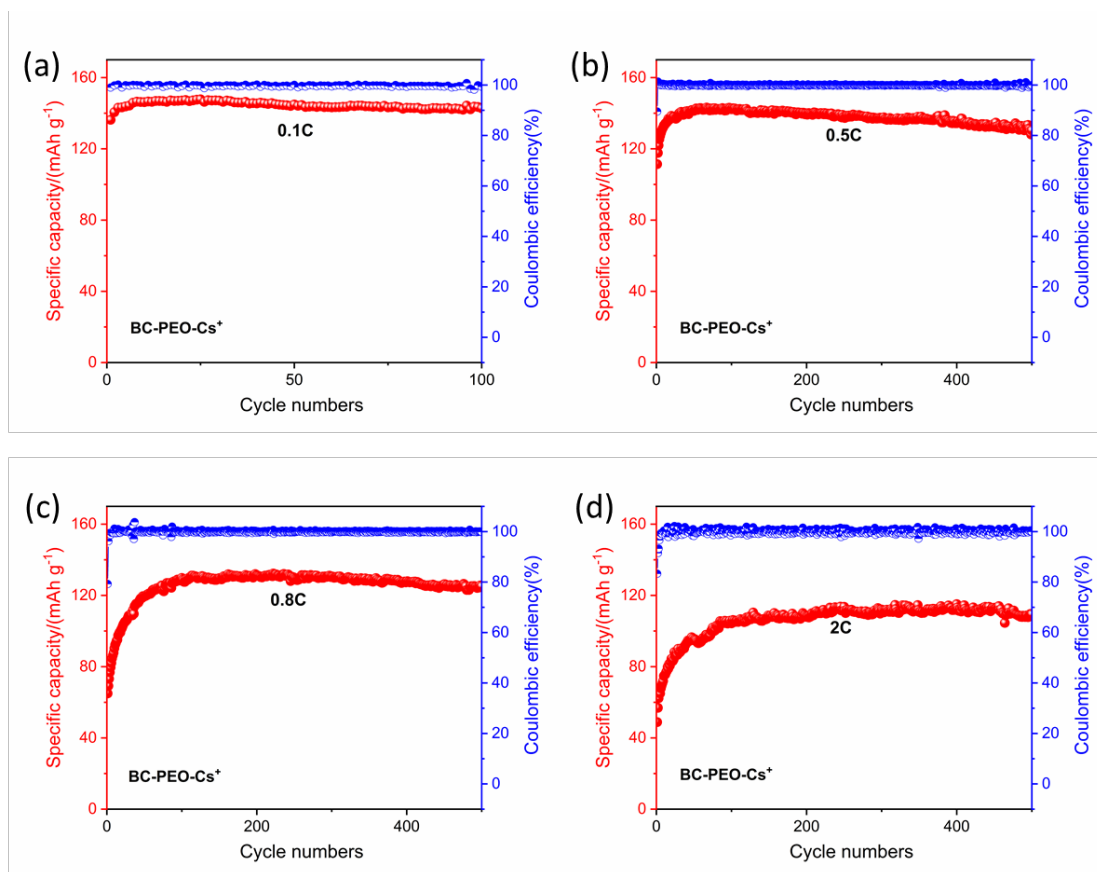

**Fig. S8** Cycling performance of Li | BC-PEO-Cs<sup>+</sup> | LiFePO<sub>4</sub> cells at 0.1 C, 0.5 C, 0.8C, 2 C. (All of the cells are tested at an operating temperature of 60 °C)

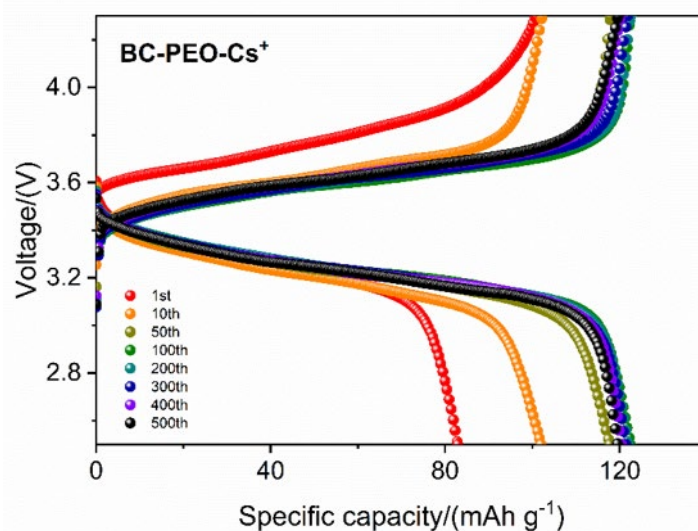

**Fig. S9** Charge-discharge profiles of Li | BC-PEO-Cs<sup>+</sup> | LiFePO<sub>4</sub> cell at 1 C. (The cell is tested at an operating temperature of 60 °C).

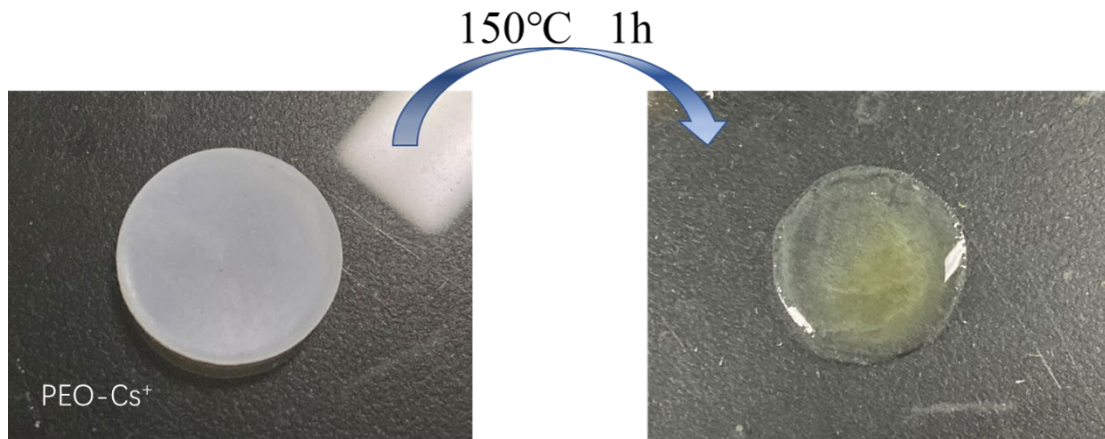

**Fig S10.** Thermal properties of PEO-Cs<sup>+</sup> electrolyte exposed at 150°C for 1 h.

Table.S1 Electrochemical performances comparison of Li-metal cells with all-solid-state electrolytes

| Li-metal cells with all-solid-state electrolytes                             | Electrochemical performance                                                             | Reference        |
|------------------------------------------------------------------------------|-----------------------------------------------------------------------------------------|------------------|
| SiO <sub>2</sub> -areogel-reinforced CPE-based Li-metal all-solid-state cell | 110 mAh·g <sup>-1</sup> , 0.5 C, room temperature                                       | 1                |
| LLTO-(PEO-FEC) CSSE-based LiFePO <sub>4</sub> -Li cell                       | 115 mAh·g <sup>-1</sup> , 0.5C, 50 °C<br>86 mAh·g <sup>-1</sup> , 0.5 C, 35 °C          | 2                |
| Li/PEO-Cs <sup>+</sup> /LiFePO <sub>4</sub> cell                             | 120 mAh·g <sup>-1</sup> , 0.5 C, 60 °C                                                  | 3                |
| solid-polymer-electrolyte-based LiFePO <sub>4</sub> -Li cell                 | 134 mAh·g <sup>-1</sup> , 0.2 C, 60 °C<br>101.7 mAh·g <sup>-1</sup> , 0.5 C, 60 °C      | 4                |
| <b>Li/BC-PEO-Cs<sup>+</sup>/LiFePO<sub>4</sub> cell</b>                      | <b>142 mAh·g<sup>-1</sup>, 0.5 C, 60 °C</b><br><b>100 mAh·g<sup>-1</sup>, 2 C, 60°C</b> | <b>This work</b> |

## Reference

1. D. Lin, P. Y. Yuen, Y. Liu, W. Liu, N. Liu, R. H. Dauskardt and Y. Cui, *Advanced Materials*, 2018, **30**, e1802661.
2. H. Li, W. Liu, X. Yang, J. Xiao, Y. Li, L. Sun, X. Ren, P. Zhang and H. Mi, *Chem. Eng. J.*, 2020, **408**, 127254.
3. X. Yang, Q. Sun, C. Zhao, X. Gao, K. Adair, Y. Zhao, J. Luo, X. Lin, J. Liang, H. Huang, L. Zhang, S. Lu, R. Li and X. Sun, *Energy Storage Materials*, 2019, **22**, 194-199.
4. Z. Zhao, Y. Zhang, S. Li, S. Wang, Y. Li, H. Mi, L. Sun, X. Ren and P. Zhang, *Journal of Materials Chemistry A*, 2019, **7**, 25818-25823.
